# Supplementary material for: TP53 mutations and protein immunopositivity may predict for poor outcome but also for trastuzumab benefit in patients with early breast cancer treated in the adjuvant setting
Source: PubMed Central journal article supplement (PMC5078047; doi:10.18632/oncotarget.9022), 2016-04-26

## TP53 mutations and protein expression may predict for poor outcome but also for trastuzumab benefit in patients with early breast cancer treated in the adjuvant setting

### Supplementary Materials

#### Supplementary File S1 Part A

##### PART A: Comparison between HER2-positive cohorts

|               |          | HER2 pos,<br>T | HER2 pos,<br>no T | Chi-square<br><i>p</i> -value | HER2<br>centrally &<br>locally positive | HER2<br>centrally<br>positive &<br>locally negative | Chi-<br>square<br><i>p</i> -value |
|---------------|----------|----------------|-------------------|-------------------------------|-----------------------------------------|-----------------------------------------------------|-----------------------------------|
| ERPgR local   | Negative | 101 (36.5)     | 58 (28.9)         | 0,081                         | 79 (44.6)                               | 7 (14.3)                                            | < 0.001                           |
|               | Positive | 176 (63.5)     | 143 (71.1)        |                               | 98 (55.4)                               | 42 (85.7)                                           |                                   |
| ERPgR central | Negative | 83 (31.0)      | 60 (32.3)         | 0,77                          | 67 (37.8)                               | 11 (22.0)                                           | 0,037                             |
|               | Positive | 185 (69.0)     | 126 (67.7)        |                               | 110 (62.2)                              | 39 (78.0)                                           |                                   |

## Supplementary File S1 Part B

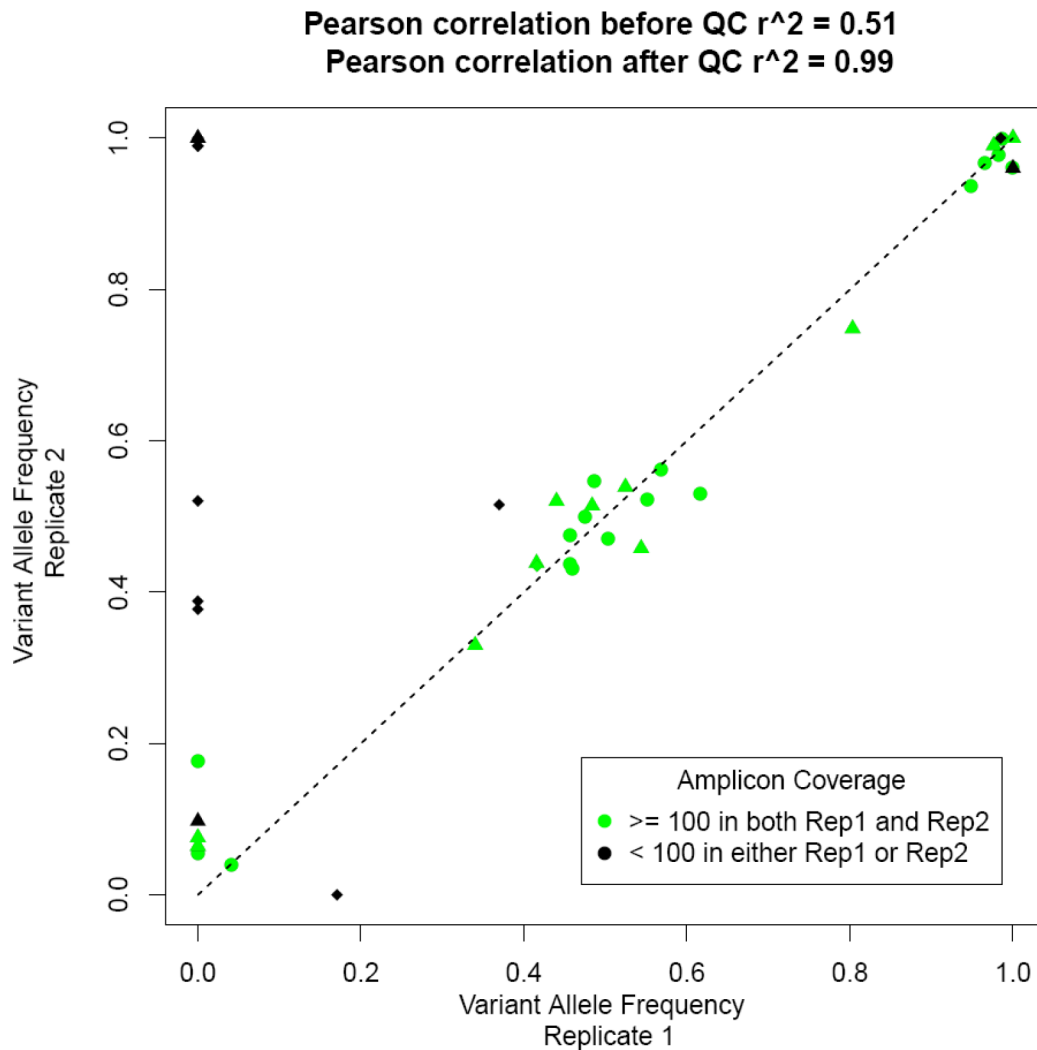

**Supplementary Figure S1: Justification of the 100-coverage threshold for accepting sequence variants with the applied panel.** In order to establish a threshold for accepting the individual variants that were returned by the Ion Reporter platform v.4, we used results from 3 FFPE DNA replicates. We evaluated the concordance of variant allele frequencies between replicates by calculating the Pearson correlation coefficient before and after Quality Control (QC). Variants that were not found in one of the two replicates were assigned zero frequency. As shown, the initial correlation between variant frequencies was poor ( $r^2 = 0.51$ ). By filtering variants with amplicon coverage less than 100, the correlation coefficient between the frequencies was 0.99 across all replicates. Circles, triangles and diamonds represent frequencies from each individual pair of replicate samples. Green: variant allele frequencies of variants that remain after QC (corresponding to amplicons with read coverage  $\geq 100$ ); black: variant allele frequencies of variants that are filtered out after QC (variants with amplicon coverage  $< 100$  times).

## Supplementary File S1 Part C

### Factors (parameters) in Multivariate models

#### Forest plot (Figure 5):

##### Luminal A/B

1. Menopausal status (post vs. pre)
2. Number of positive nodes ( $\geq 4$  vs. 0–3)
3. Histological type (invasive ductal vs. lobular vs. mixed vs. other)
4. Histological grade (I vs. II vs. III)
5. Adjuvant hormone therapy (Yes vs. No)
6. Adjuvant radiotherapy (Yes vs. No)
7. Tumor size ( $> 2$  cm vs.  $\leq 2$  cm)
8. Ki67 (continuous: incr. by 5%)

##### TNBC

1. Menopausal status (post vs. pre)
2. Number of positive nodes ( $\geq 4$  vs. 0–3)
3. Histological type (invasive ductal vs. lobular vs. mixed vs. other)
3. Histological grade (I–II vs. III)
4. Adjuvant radiotherapy (Yes vs. No)
5. Tumor size ( $> 2$  cm vs.  $\leq 2$  cm)
6. Ki67 (continuous: incr. by 5%)

##### HER2pos, pre T

1. Menopausal status (post vs. pre)
2. Number of positive nodes ( $\geq 4$  vs. 0–3)
3. Histological type (invasive ductal vs. lobular vs. mixed vs. other)
4. Histological grade (I–II vs. III)
5. Adjuvant hormone therapy (Yes vs. No)
6. Adjuvant radiotherapy (Yes vs. No)
7. Tumor size ( $> 2$  cm vs.  $\leq 2$  cm)
8. Ki67 (continuous: incr. by 5%)

##### HER2pos, post T

1. Menopausal status (post vs. pre)
2. Number of positive nodes ( $\geq 4$  vs. 0–3)
3. Histological type (invasive ductal vs. lobular vs. mixed vs. other)
4. Histological grade (I–II vs. III)
5. Adjuvant hormone therapy (Yes vs. No)
6. Adjuvant radiotherapy (Yes vs. No)
7. Tumor size ( $> 2$  cm vs.  $\leq 2$  cm)
8. Ki67 (continuous: incr. by 5%)

#### Table S5:

1. Menopausal status (post vs. pre)

2. Number of positive nodes ( $\geq 4$  vs. 0–3)
3. Histological type (invasive ductal vs. lobular vs. mixed vs. other)
4. Histological grade (I–II vs. III)
5. Adjuvant hormone therapy (Yes vs. No)
6. Adjuvant radiotherapy (Yes vs. No)
7. Tumor size ( $> 2$  cm vs.  $\leq 2$  cm)
8. Ki67 (continuous: incr. by 5%)

#### Table S6:

##### Luminal A/B

1. Menopausal status (post vs. pre)
2. Number of positive nodes ( $\geq 4$  vs. 0–3)
3. Histological type (invasive ductal vs. lobular vs. mixed vs. other)
4. Histological grade (I vs. II vs. III)
5. Adjuvant hormone therapy (Yes vs. No)
6. Adjuvant radiotherapy (Yes vs. No)
7. Tumor size ( $> 2$  cm vs.  $\leq 2$  cm)
8. Ki67 (continuous: incr. by 5%)

##### TNBC

1. Menopausal status (post vs. pre)
2. Number of positive nodes ( $\geq 4$  vs. 0–3)
3. Histological type (invasive ductal vs. lobular vs. mixed vs. other)
4. Histological grade (I–II vs. III)
5. Adjuvant radiotherapy (Yes vs. No)
6. Tumor size ( $> 2$  cm vs.  $\leq 2$  cm)
7. Ki67 (continuous: incr. by 5%)

##### HER2pos, pre T

1. Menopausal status (post vs. pre)
2. Number of positive nodes ( $\geq 4$  vs. 0–3)
3. Histological type (invasive ductal vs. lobular vs. mixed vs. other)
4. Histological grade (I–II vs. III)
5. Adjuvant hormone therapy (Yes vs. No)
6. Adjuvant radiotherapy (Yes vs. No)
7. Tumor size ( $> 2$  cm vs.  $\leq 2$  cm)
8. Ki67 (continuous: incr. by 5%)

##### HER2pos, post T

1. Menopausal status (post vs. pre)
2. Number of positive nodes ( $\geq 4$  vs. 0–3)
3. Histological type (invasive ductal vs. lobular vs. mixed vs. other)
4. Histological grade (I–II vs. III)
5. Adjuvant hormone therapy (Yes vs. No)

6. Adjuvant radiotherapy (Yes vs. No)
7. Tumor size (> 2 cm vs. ≤ 2 cm)
8. Ki67 (continuous: incr. by 5%)

**Table S8:**

**Luminal A/B**

9. Menopausal status (post vs. pre)
10. Number of positive nodes (≥ 4 vs. 0–3)
11. Histological type (invasive ductal vs. lobular vs. mixed vs. other)
12. Histological grade (I vs. II vs. III)
13. Adjuvant hormonotherapy (Yes vs. No)
14. Adjuvant radiotherapy (Yes vs. No)
15. Tumor size (> 2 cm vs. ≤ 2 cm)
16. Ki67 (continuous: incr. by 5%)

**TNBC**

8. Menopausal status (post vs. pre)
9. Number of positive nodes (≥4 vs. 0–3)
10. Histological type (invasive ductal vs. lobular vs. mixed vs. other)
11. Histological grade (I–II vs. III)
12. Adjuvant radiotherapy (Yes vs. No)
13. Tumor size (> 2 cm vs. ≤ 2 cm)
14. Ki67 (continuous: incr. by 5%)

**HER2pos, pre T**

9. Menopausal status (post vs. pre)
10. Number of positive nodes (≥4 vs. 0–3)
11. Histological type (invasive ductal vs. lobular vs. mixed vs. other)
12. Histological grade (I–II vs. III)
13. Adjuvant hormonotherapy (Yes vs. No)
14. Adjuvant radiotherapy (Yes vs. No)
15. Tumor size (> 2 cm vs. ≤ 2 cm)
16. Ki67 (continuous: incr. by 5%)

**HER2pos, post T**

9. Menopausal status (post vs. pre)
10. Number of positive nodes (≥ 4 vs. 0–3)
11. Histological type (invasive ductal vs. lobular vs. mixed vs. other)
12. Histological grade (I–II vs. III)
13. Adjuvant hormonotherapy (Yes vs. No)
14. Adjuvant radiotherapy (Yes vs. No)
15. Tumor size (> 2 cm vs. ≤ 2 cm)
16. Ki67 (continuous: incr. by 5%)

**Table S9:**

**Luminal A/B**

17. Menopausal status (post vs. pre)
18. Number of positive nodes (≥ 4 vs. 0–3)
19. Histological type (invasive ductal vs. lobular vs. mixed vs. other)
20. Histological grade (I vs. II vs. III)
21. Adjuvant hormonotherapy (Yes vs. No)
22. Adjuvant radiotherapy (Yes vs. No)
23. Tumor size (> 2 cm vs. ≤ 2 cm)
24. Ki67 (continuous: incr. by 5%)

**TNBC**

15. Menopausal status (post vs. pre)
16. Number of positive nodes (≥ 4 vs. 0–3)
17. Histological type (invasive ductal vs. lobular vs. mixed vs. other)
18. Histological grade (I–II vs. III)
19. Adjuvant radiotherapy (Yes vs. No)
20. Tumor size (>2 cm vs. ≤ 2 cm)
21. Ki67 (continuous: incr. by 5%)

**HER2pos, pre T**

17. Menopausal status (post vs. pre)
18. Number of positive nodes (≥ 4 vs. 0–3)
19. Histological type (invasive ductal vs. lobular vs. mixed vs. other)
20. Histological grade (I–II vs. III)
21. Adjuvant hormonotherapy (Yes vs. No)
22. Adjuvant radiotherapy (Yes vs. No)
23. Tumor size (> 2 cm vs. ≤ 2 cm)
24. Ki67 (continuous: incr. by 5%)

**HER2pos, post T**

17. Menopausal status (post vs. pre)
18. Number of positive nodes (≥ 4 vs. 0–3)
19. Histological type (invasive ductal vs. lobular vs. mixed vs. other)
20. Histological grade (I–II vs. III)
21. Adjuvant hormonotherapy (Yes vs. No)
22. Adjuvant radiotherapy (Yes vs. No)
23. Tumor size (> 2 cm vs. ≤ 2 cm)
24. Ki67 (continuous: incr. by 5%)

**Supplementary Table S1: Associations of TP53 and PIK3CA mutations with clinicopathological variables**

**Supplementary Table S2: Associations of p53 IHC (10% cut-off) with clinicopathological variables**

|                             | p53 IHC (positive if $\geq 10\%$ ) |              |                 |
|-----------------------------|------------------------------------|--------------|-----------------|
|                             | Negative                           | Positive     | <i>p</i> -value |
| <b>Patients</b>             |                                    |              |                 |
| N                           | 737                                | 848          |                 |
| <b>Age (years)</b>          |                                    |              |                 |
| Median                      | 53.5                               | 52.5         | 0.066           |
| Min-Max                     | (22.4–79.3)                        | (21.0–82.9)  |                 |
| <b>Tumor size</b>           |                                    |              |                 |
| Median                      | 2.5                                | 2.5          | 0.13            |
| Min-Max                     | (0.0–11.5)                         | (0.0–14.8)   |                 |
| <b>Ki67</b>                 |                                    |              |                 |
| Median                      | 20                                 | 25           | < 0.001         |
| Min-Max                     | (0.0–100.0)                        | (0.0–100.0)  |                 |
| <b>CEN17 copies</b>         |                                    |              |                 |
| Median                      | 2                                  | 2.1          | 0.51            |
| Min-Max                     | (0.6–15.2)                         | (1.0–17.5)   |                 |
|                             | <i>N</i> (%)                       | <i>N</i> (%) |                 |
| <b>Age</b>                  |                                    |              |                 |
| ≤ 50                        | 276 (37.5)                         | 374 (44.0)   | 0.009           |
| > 50                        | 460 (62.5)                         | 476 (56.0)   |                 |
| <b>Menopausal status</b>    |                                    |              |                 |
| Postmenopausal              | 414 (56.3)                         | 435 (51.2)   | 0.043           |
| Premenopausal               | 322 (43.8)                         | 415 (48.8)   |                 |
| <b>Tumor size</b>           |                                    |              |                 |
| ≤ 2                         | 245 (33.3)                         | 323 (38.0)   | 0.051           |
| > 2                         | 491 (66.7)                         | 527 (62.0)   |                 |
| <b>Positive lymph nodes</b> |                                    |              |                 |
| 0–3                         | 441 (59.9)                         | 517 (60.8)   | 0.71            |
| ≥ 4                         | 295 (40.1)                         | 333 (39.2)   |                 |
| <b>Histological grade</b>   |                                    |              |                 |
| I                           | 49 (6.7)                           | 51 (6.0)     | 0.19            |
| II                          | 337 (45.9)                         | 355 (42.0)   |                 |
| III                         | 348 (47.4)                         | 440 (52.0)   |                 |
| <b>Histological type</b>    |                                    |              |                 |
| DIC-NST                     | 588 (79.9)                         | 714 (84.0)   | 0.11            |
| Invasive lobular            | 70 (9.5)                           | 65 (7.6)     |                 |
| Mixed                       | 35 (4.8)                           | 39 (4.6)     |                 |
| Other                       | 43 (5.8)                           | 32 (3.8)     |                 |
| <b>Surgery (binary)</b>     |                                    |              |                 |
| MRM                         | 439 (59.6)                         | 459 (54.1)   | 0.027           |

|                                          |            |            |         |
|------------------------------------------|------------|------------|---------|
| Other                                    | 297 (40.4) | 389 (45.9) |         |
| <b>Hormonotherapy</b>                    |            |            |         |
| No                                       | 168 (22.9) | 200 (23.6) | 0.71    |
| Yes                                      | 567 (77.1) | 646 (76.4) |         |
| <b>Radiotherapy</b>                      |            |            |         |
| No                                       | 181 (25.3) | 178 (21.5) | 0.079   |
| Yes                                      | 534 (74.7) | 649 (78.5) |         |
| <b>Subtypes, entire cohort</b>           |            |            |         |
| Luminal A                                | 258 (35.0) | 239 (28.2) | 0.002   |
| Luminal B                                | 198 (26.9) | 245 (28.9) |         |
| Luminal-HER2                             | 129 (17.5) | 151 (17.8) |         |
| HER2-Enriched                            | 50 (6.8)   | 100 (11.8) |         |
| TNBC                                     | 102 (13.8) | 113 (13.3) |         |
| <b>Subtypes, entire cohort, combined</b> |            |            |         |
| Luminal A/B                              | 456 (61.9) | 484 (57.1) | 0.058   |
| HER2-positive                            | 179 (24.3) | 251 (29.6) |         |
| TNBC                                     | 102 (13.8) | 113 (13.3) |         |
| <b>Subtypes concordant*</b>              |            |            |         |
| Luminal A                                | 35 (6.4)   | 53 (8.7)   | 0.13    |
| Luminal B                                | 226 (41.5) | 221 (36.2) |         |
| Luminal-HER2                             | 167 (30.7) | 206 (33.7) |         |
| HER2-Enriched                            | 60 (11.0)  | 80 (13.1)  |         |
| TNBC                                     | 56 (10.3)  | 51 (8.3)   |         |
| <b>Subtype concordant combined</b>       |            |            |         |
| Luminal A/B                              | 393 (72.2) | 426 (70.0) | 0.14    |
| HER2-positive                            | 95 (17.5)  | 132 (21.7) |         |
| TNBC                                     | 56 (10.3)  | 51 (8.4)   |         |
| <b>Basal</b>                             |            |            |         |
| Basal                                    | 144 (19.7) | 205 (24.3) | 0.029   |
| non-Basal                                | 587 (80.3) | 639 (75.7) |         |
| <b>RandomGroup</b>                       |            |            |         |
| E-CMF                                    | 20 (2.7)   | 61 (7.2)   | < 0.001 |
| E-CMF-Doc                                | 65 (8.8)   | 99 (11.6)  |         |
| E-CMF-T                                  | 69 (9.4)   | 105 (12.4) |         |
| E-T-CMF                                  | 472 (64.0) | 477 (56.1) |         |
| ET-CMF                                   | 111 (15.1) | 108 (12.7) |         |

Notes: MRM: modified radical mastectomy; \*: same ER/PgR and HER2 status upon local and central testing.

**Supplementary Table S3: Associations between mutations and p53 IHC, including concordance evaluation between TP53 mutations and IHC**

|                   | p53 IHC 10% cut off |          |          |          |       |       | <i>Total</i> | Cohen's<br>Kappa    | Chi-square<br><i>p</i> -value |
|-------------------|---------------------|----------|----------|----------|-------|-------|--------------|---------------------|-------------------------------|
|                   | < 10%               |          |          | ≥ 10%    |       |       |              |                     |                               |
|                   | <i>N</i>            | row<br>% | col<br>% | <i>N</i> | row % | col % |              |                     |                               |
| <b>TP53_MUT</b>   |                     |          |          |          |       |       |              |                     |                               |
| NO                | 647                 | 52.4     | 87.8     | 587      | 47.6  | 69.2  | 1234         | 0.18<br>(0.14–0.22) | < 0.001                       |
| YES               | 90                  | 25.6     | 12.2     | 261      | 74.4  | 30.8  | 351          |                     |                               |
| <i>Total</i>      | 737                 |          |          | 848      |       |       | 1585         |                     |                               |
| <b>PIK3CA_MUT</b> |                     |          |          |          |       |       |              |                     |                               |
| NO                | 556                 | 48.0     | 75.4     | 602      | 52.0  | 71.0  | 1158         |                     | 0.046                         |
| YES               | 181                 | 42.4     | 24.6     | 246      | 57.6  | 29.0  | 427          |                     |                               |
| <i>Total</i>      | 737                 |          |          | 848      |       |       | 1585         |                     |                               |

**Supplementary Table S4: Univariate cox testing for interaction between mutation parameters and Luminal A vs. Luminal B subtypes**

| <b>Mutation parameter</b> | <b>comparison</b>                        | <b>N patients</b> | <b>N events</b> | <b>HR</b> | <b>95%CI</b> | <b>Wald's p</b> |
|---------------------------|------------------------------------------|-------------------|-----------------|-----------|--------------|-----------------|
| <b>TP53 MUT</b>           | TP53 MUT YES vs NO At LumA               | 49 vs. 539        | 16 vs. 87       | 2.24      | 1.31–3.81    | 0.28            |
|                           | TP53 MUT YES vs NO At LumB               | 94 vs. 369        | 31 vs. 84       | 1.54      | 1.02–2.33    |                 |
|                           | LumB vs LumA At TP53 MUT = NO            | 369 vs. 539       | 84 vs. 87       | 1.34      | 0.99–1.81    |                 |
|                           | LumB vs LumA At TP53 MUT = YES           | 94 vs. 49         | 31 vs. 16       | 0.93      | 0.51–1.70    |                 |
| <b>TP53 domains</b>       | TP53 domains DBD vs none At LumA         | 31 vs. 539        | 7 vs. 87        | 1.41      | 0.65–3.04    | 0.043           |
|                           | TP53 domains other vs none At LumA       | 18 vs. 539        | 9 vs. 87        | 4.14      | 2.08–8.22    |                 |
|                           | TP53 domains DBD vs none At LumB         | 62 vs. 369        | 23 vs. 84       | 1.71      | 1.08–2.72    |                 |
|                           | TP53 domains other vs none At LumB       | 32 vs. 369        | 8 vs. 84        | 1.20      | 0.58–2.49    |                 |
|                           | LumB vs LumA At TP53 domains = none      | 369 vs. 539       | 84 vs. 87       | 1.34      | 0.99–1.81    |                 |
|                           | LumB vs LumA At TP53 domains = DBD       | 62 vs. 31         | 23 vs. 7        | 1.63      | 0.70–3.81    |                 |
|                           | LumB vs LumA At TP53 domains = other     | 32 vs. 18         | 8 vs. 9         | 0.39      | 0.15–1.01    |                 |
| <b>PIK3CA MUT</b>         | PIK3CA MUT YES vs NO At LumA             | 195 vs. 393       | 30 vs. 73       | 0.79      | 0.52–1.21    | 0.44            |
|                           | PIK3CA MUT YES vs NO At LumB             | 136 vs. 327       | 34 vs. 81       | 1.00      | 0.67–1.49    |                 |
|                           | LumB vs LumA At PIK3CA MUT = NO          | 327 vs. 393       | 81 vs. 73       | 1.26      | 0.92–1.73    |                 |
|                           | LumB vs LumA At PIK3CA MUT = YES         | 136 vs. 195       | 34 vs. 30       | 1.59      | 0.97–2.60    |                 |
| <b>PIK3CA domains</b>     | PIK3CA domains KINASE vs none At LumA    | 94 vs. 393        | 14 vs. 73       | 0.75      | 0.42–1.33    | 0.54            |
|                           | PIK3CA domains other vs none At LumA     | 101 vs. 393       | 16 vs. 73       | 0.84      | 0.49–1.44    |                 |
|                           | PIK3CA domains KINASE vs none At LumB    | 91 vs. 327        | 24 vs. 81       | 1.12      | 0.71–1.76    |                 |
|                           | PIK3CA domains other vs none At LumB     | 45 vs. 327        | 10 vs. 81       | 0.80      | 0.41–1.54    |                 |
|                           | LumB vs LumA At PIK3CA domains = none    | 327 vs. 393       | 81 vs. 73       | 1.26      | 0.92–1.73    |                 |
|                           | LumB vs LumA At PIK3CA domains = KINASE  | 91 vs. 94         | 24 vs. 14       | 1.88      | 0.97–3.63    |                 |
|                           | LumB vs LumA At PIK3CA domains = other   | 45 vs. 101        | 10 vs. 16       | 1.20      | 0.54–2.65    |                 |
| <b>TP53 or PIK3CA MUT</b> | TP53 or PIK3CA MUT YES vs NO At LumA     | 225 vs. 363       | 39 vs. 64       | 0.96      | 0.64–1.42    | 0.47            |
|                           | TP53 or PIK3CA MUT YES vs NO At LumB     | 198 vs. 265       | 53 vs. 62       | 1.17      | 0.81–1.69    |                 |
|                           | LumB vs LumA At TP53 or PIK3CA MUT = NO  | 265 vs. 363       | 62 vs. 64       | 1.24      | 0.88–1.77    |                 |
|                           | LumB vs LumA At TP53 or PIK3CA MUT = YES | 198 vs. 225       | 53 vs. 39       | 1.52      | 1.00–2.30    |                 |
| <b>MUT breakdown</b>      | PIK3CA only vs NONE At LumA              | 176 vs. 363       | 23 vs. 64       | 0.70      | 0.44–1.13    | 0.67            |
|                           | TP53 only vs NONE At LumA                | 30 vs. 363        | 9 vs. 64        | 1.79      | 0.89–3.60    |                 |
|                           | both vs NONE At LumA                     | 19 vs. 363        | 7 vs. 64        | 2.38      | 1.09–5.20    |                 |
|                           | PIK3CA only vs NONE At LumB              | 104 vs. 265       | 22 vs. 62       | 0.89      | 0.55–1.45    |                 |
|                           | TP53 only vs NONE At LumB                | 62 vs. 265        | 19 vs. 62       | 1.39      | 0.83–2.33    |                 |
|                           | both vs NONE At LumB                     | 32 vs. 265        | 12 vs. 62       | 1.70      | 0.91–3.16    |                 |
|                           | LumB vs LumA At = NONE                   | 265 vs. 363       | 62 vs. 64       | 1.24      | 0.88–1.77    |                 |
|                           | LumB vs LumA At = PIK3CA only            | 104 vs. 176       | 22 vs. 23       | 1.58      | 0.88–2.84    |                 |
|                           | LumB vs LumA At = TP53 only              | 62 vs. 30         | 19 vs. 9        | 0.96      | 0.44–2.14    |                 |
|                           | LumB vs LumA At = both                   | 32 vs. 19         | 12 vs. 7        | 0.89      | 0.35–2.26    |                 |



**Supplementary Table S5: Univariate Cox analysis for clinicopathological parameters in the entire cohort against disease-free survival**

**Supplementary Table S6: Multivariable analysis in centrally assessed HER2-positive tumors, including interactions between trastuzumab and TP53-related parameters**

| Parameter                                                                                   | N patients | N events  | HR   | 95% CI     | Wald's <i>p</i> |
|---------------------------------------------------------------------------------------------|------------|-----------|------|------------|-----------------|
| <b>HER2 positive, post-trastuzumab, N = 208; p53 IHC interaction included in the model</b>  |            |           |      |            |                 |
| Histological grade III vs. I-II                                                             | 137 vs. 71 | 15 vs. 14 | 0.54 | 0.26–1.13  | 0.10            |
| Radiotherapy Yes vs. No                                                                     | 158 vs. 50 | 25 vs. 4  | 2.26 | 0.77–6.64  | 0.14            |
| p53 IHC 10% cut off * T-treatment                                                           |            |           |      |            | 0.015           |
| p53 IHC ≥ 10% vs < 10% @ T-treated                                                          | 112 vs. 51 | 5 vs. 13  | 0.16 | 0.06–0.44  |                 |
| p53 IHC ≥ 10% vs < 10% @ non-T-treated                                                      | 25 vs. 20  | 6 vs. 5   | 1.09 | 0.33–3.60  |                 |
| T-treated vs non-T-treated @ p53 IHC < 10%                                                  | 51 vs. 20  | 13 vs. 5  | 0.98 | 0.35–2.77  |                 |
| T-treated vs non-T-treated @ p53 IHC ≥ 10%                                                  | 112 vs. 25 | 5 vs. 6   | 0.14 | 0.04–0.46  |                 |
| <b>HER2 positive, post-trastuzumab, N = 224; TP53 MUT interaction included in the model</b> |            |           |      |            |                 |
| Histological type, Invasive lobular vs. ductal                                              | 4 vs. 210  | 3 vs. 26  | 5.35 | 1.48–19.31 | 0.010           |
| Histological type, mixed vs. ductal                                                         | 3 vs. 210  | 1 vs. 26  | 2.30 | 0.30–17.67 | 0.42            |
| Histological type, other vs. ductal                                                         | 7 vs. 210  | 1 vs. 26  | 0.59 | 0.07–4.69  | 0.62            |
| Radiotherapy Yes vs. No                                                                     | 169 vs. 55 | 27 vs. 4  | 2.21 | 0.77–6.37  | 0.14            |
| TP53 MUT YES/NO * T-treatment                                                               |            |           |      |            | 0.010           |
| TP53_MUT YES vs NO @ T-treated                                                              | 75 vs. 100 | 4 vs. 15  | 0.37 | 0.12–1.11  |                 |
| TP53_MUT YES vs NO @ non-T-treated                                                          | 13 vs. 36  | 5 vs. 7   | 3.17 | 0.93–10.80 |                 |
| T-treated vs non-T-treated @ TP53_MUT, NO                                                   | 100 vs. 36 | 15 vs. 7  | 0.78 | 0.30–2.02  |                 |
| T-treated vs non-T-treated @ TP53_MUT, YES                                                  | 75 vs. 13  | 4 vs. 5   | 0.09 | 0.02–0.35  |                 |

Notes: T: trastuzumab; IHC: Immunohistochemistry; \*: interaction.

**Supplementary Table S7: Multivariable analysis in concordant cases only (total N = 1248) by using the same adjustment as in the entire cohort**

|                                                                 | <i>N</i> patients | <i>N</i> events | HR   | 95% CI     | Wald's <i>p</i> |
|-----------------------------------------------------------------|-------------------|-----------------|------|------------|-----------------|
| <b>HER2-positive, no T (HE10/97 and HE10/00) (N = 88)</b>       |                   |                 |      |            |                 |
| Nodes positive categorical $\geq 4$ vs. 0-3                     | 48 vs. 40         | 23 vs. 6        | 3.94 | 1.60-9.68  | 0.003           |
| Tumor size categorical $> 2$ vs. $\leq 2$ cm                    | 68 vs. 20         | 26 vs. 3        | 2.88 | 0.87-9.51  | 0.083           |
| <b>HER2-positive, T-treated (HE10/05 and HE10/08) (N = 142)</b> |                   |                 |      |            |                 |
| Nodes positive categorical $\geq 4$ vs. 0-3                     | 52 vs. 90         | 12 vs. 8        | 2.24 | 0.90-5.53  | 0.082           |
| p53 IHC $\geq 10\%$ vs. $< 10\%$                                | 87 vs. 55         | 6 vs. 14        | 0.28 | 0.11-0.73  | 0.010           |
| <b>Luminal A/B (N = 888)</b>                                    |                   |                 |      |            |                 |
| Nodes positive categorical $\geq 4$ vs. 0-3                     | 355 vs. 533       | 117 vs. 54      | 2.95 | 2.12-4.10  | $< 0.001$       |
| Histological grade                                              |                   |                 |      |            | 0.12            |
| <i>Histological grade II vs. I</i>                              | 491 vs. 84        | 88 vs. 7        | 1.48 | 0.68-3.22  | 0.32            |
| <i>Histological grade III vs. I</i>                             | 313 vs. 84        | 76 vs. 7        | 1.91 | 0.87-4.19  | 0.10            |
| Tumor size categorical $> 2$ vs. $\leq 2$ cm                    | 549 vs. 339       | 130 vs. 41      | 1.54 | 1.08-2.19  | 0.018           |
| TP53 mutations YES vs. NO                                       | 112 vs. 776       | 35 vs. 136      | 1.69 | 1.16-2.47  | 0.006           |
| <b>TNBC (N = 111)</b>                                           |                   |                 |      |            |                 |
| Nodes positive categorical $\geq 4$ vs. 0-3                     | 39 vs. 72         | 17 vs. 7        | 4.85 | 2.00-11.78 | $< 0.001$       |

Notes: T: trastuzumab; IHC: Immunohistochemistry ; Luminal A/B: ER/PgR positive, HER2-negative.

**Supplementary Table S8: Tumor typing according to local and central testing**

| ER/PgR status                         | <i>N</i> | %    |
|---------------------------------------|----------|------|
| Locally positive / centrally positive | 1462     | 86.4 |
| Locally negative / centrally positive | 150      | 8.9  |
| Locally positive / centrally negative | 81       | 4.8  |
| <b>Total Assessed cases</b>           | 1693     |      |
| <b>Total Discordant cases</b>         | 231      | 13.6 |
| <b>HER2 status</b>                    | <i>N</i> | %    |
| Locally positive / centrally positive | 1462     | 87.5 |
| Locally negative / centrally positive | 74       | 4.4  |
| Locally positive / centrally negative | 135      | 8.1  |
| <b>Total Assessed cases</b>           | 1671     |      |
| <b>Total Discordant cases</b>         | 209      | 12.5 |

**Supplementary Table S9: Multivariable analysis (DFS) for mutant gene domains in the entire cohort**

|                                                                          | <i>N</i> patients | <i>N</i> events | HR   | 95% CI    | Wald's <i>p</i> |
|--------------------------------------------------------------------------|-------------------|-----------------|------|-----------|-----------------|
| <b>HER2-positive, no T (HE10/97 &amp; HE10/00) (<i>N</i> = 178)</b>      |                   |                 |      |           |                 |
| Nodes positive categorical $\geq 4$ vs. 0–3                              | 96 vs. 82         | 44 vs. 17       | 2.31 | 1.31–4.10 | 0.004           |
| Tumor size categorical $> 2$ vs. $\leq 2$ cm                             | 138 vs. 40        | 54 vs. 7        | 2.61 | 1.18–5.77 | 0.017           |
| p53 IHC $\geq 10\%$ vs. $< 10\%$                                         | 92 vs. 86         | 38 vs. 23       | 1.56 | 0.92–2.65 | 0.098           |
| <b>HER2-positive, T-treated (HE10/05 &amp; HE10/08) (<i>N</i> = 252)</b> |                   |                 |      |           |                 |
| Nodes positive categorical $\geq 4$ vs. 0–3                              | 79 vs. 173        | 160 vs. 92      | 2.09 | 1.02–4.26 | 0.043           |
| p53 IHC $\geq 10\%$ vs. $< 10\%$                                         | 17 vs. 15         | 12 vs. 20       | 0.37 | 0.18–0.77 | 0.008           |
| <b>Luminal A/B (<i>N</i> = 1044)</b>                                     |                   |                 |      |           |                 |
| Nodes positive categorical $\geq 4$ vs. 0–3                              | 422 vs. 622       | 141 vs. 76      | 2.46 | 1.85–3.26 | $< 0.001$       |
| Histological grade                                                       |                   |                 |      |           | 0.025           |
| <i>Histological grade II vs. I</i>                                       | 558 vs. 98        | 109 vs. 8       | 1.95 | 0.95–4.01 | 0.069           |
| <i>Histological grade III vs. I</i>                                      | 388 vs. 98        | 100 vs. 8       | 2.47 | 1.20–5.10 | 0.015           |
| Tumor size categorical $> 2$ vs. $\leq 2$ cm                             | 653 vs. 391       | 164 vs. 53      | 1.54 | 1.13–2.11 | 0.007           |
| TP53 mutant domains                                                      |                   |                 |      |           | 0.011           |
| <i>DBD vs. none</i>                                                      | 93 vs. 902        | 30 vs. 170      | 1.65 | 1.11–2.45 | 0.013           |
| <i>Other vs. none</i>                                                    | 49 vs. 902        | 17 vs. 170      | 1.68 | 1.01–2.77 | 0.044           |
| <b>TNBC (<i>N</i> = 235)</b>                                             |                   |                 |      |           |                 |
| Nodes positive categorical $\geq 4$ vs. 0–3                              | 82 vs. 153        | 33 vs. 26       | 2.41 | 1.43–4.04 | 0.001           |
| Histological grade III vs. I–II                                          | 180 vs. 55        | 38 vs. 21       | 0.47 | 0.27–0.82 | 0.008           |
| TP53 domains                                                             |                   |                 |      |           | 0.060           |
| <i>DBD vs. none</i>                                                      | 41 vs. 150        | 15 vs. 32       | 2.11 | 1.12–3.97 | 0.021           |
| <i>Other vs. none</i>                                                    | 44 vs. 150        | 12 vs. 32       | 1.53 | 0.78–3.01 | 0.22            |

Notes: T: trastuzumab; IHC: Immunohistochemistry; DBD: DNA binding domain; Luminal A/B: ER/PgR positive, HER2 negative.

**Supplementary Table S10: Multivariable analysis (DFS) for mutant gene domains in concordant cases only**

|                                                                          | <i>N</i> patients | <i>N</i> events | HR   | 95% CI     | Wald's <i>p</i> |
|--------------------------------------------------------------------------|-------------------|-----------------|------|------------|-----------------|
| <b>HER2-positive, no T (HE10/97 &amp; HE10/00) (<i>N</i> = 88)</b>       |                   |                 |      |            |                 |
| Nodes positive categorical $\geq 4$ vs. 0–3                              | 48 vs. 40         | 23 vs. 6        | 3.94 | 1.60–9.68  | 0.003           |
| Tumor size categorical $> 2$ vs. $\leq 2$ cm                             | 68 vs. 20         | 26 vs. 3        | 2.88 | 0.87–9.51  | 0.083           |
| <b>HER2-positive, T-treated (HE10/05 &amp; HE10/08) (<i>N</i> = 142)</b> |                   |                 |      |            |                 |
| Nodes positive categorical $\geq 4$ vs. 0–3                              | 52 vs. 90         | 12 vs. 8        | 2.24 | 0.90–5.53  | 0.082           |
| p53 IHC $\geq 10\%$ vs. $< 10\%$                                         | 87 vs. 55         | 6 vs. 14        | 0.28 | 0.11–0.73  | 0.010           |
| <b>Luminal A/B (<i>N</i> = 888)</b>                                      |                   |                 |      |            |                 |
| Nodes positive categorical $\geq 4$ vs. 0–3                              | 355 vs. 533       | 117 vs. 54      | 2.95 | 2.12–4.10  | $< 0.001$       |
| Histological grade                                                       |                   |                 |      |            | 0.12            |
| <i>Histological grade II vs. I</i>                                       | 491 vs. 84        | 88 vs. 7        | 1.48 | 0.68–3.22  | 0.32            |
| <i>Histological grade III vs. I</i>                                      | 313 vs. 84        | 76 vs. 7        | 1.91 | 0.87–4.19  | 0.10            |
| Tumor size categorical $> 2$ vs. $\leq 2$ cm                             | 549 vs. 339       | 130 vs. 41      | 1.53 | 1.07–2.19  | 0.019           |
| TP53 mutant domains                                                      |                   |                 |      |            | 0.023           |
| <i>DBD vs. none</i>                                                      | 71 vs. 776        | 21 vs. 136      | 1.67 | 1.05–2.66  | 0.031           |
| <i>other vs. none</i>                                                    | 41 vs. 776        | 14 vs. 136      | 1.73 | 0.99–3.01  | 0.053           |
| <b>TNBC (<i>N</i> = 111)</b>                                             |                   |                 |      |            |                 |
| Nodes positive categorical $\geq 4$ vs. 0–3                              | 39 vs. 72         | 17 vs. 7        | 4.85 | 2.00–11.78 | $< 0.001$       |

Notes: T: trastuzumab; IHC: Immunohistochemistry; DBD: DNA binding domain; Luminal A/B: ER/PgR-positive, HER2-negative.

**Supplementary Table S11: Description of the 4 HeCOG trials for patients with operable high-risk breast cancer**

**Supplementary Table S12: Comparison between the entire cohort of 3491 patients who participated in the four adjuvant trials vs. the study cohort of 1766 patients with informative NGS data**

| Odds ratio estimates                          |      |           |                 |
|-----------------------------------------------|------|-----------|-----------------|
| Effect                                        | OR   | 95% CI    | Wald's <i>p</i> |
| <b>CEN17 copies (incr. by 1)</b>              |      |           |                 |
|                                               | 0.99 | 0.93–1.06 | 0.75            |
| <b>Ki67 (% of positive cells, incr. by 5)</b> |      |           |                 |
|                                               | 1.02 | 1.00–1.04 | 0.034           |
| <b>Age (years)</b>                            |      |           |                 |
| > 50 vs. ≤ 50                                 | 1.23 | 0.88–1.74 | 0.23            |
| <b>Menopausal status</b>                      |      |           |                 |
| Post vs. Pre                                  | 0.80 | 0.57–1.11 | 0.18            |
| <b>Tumor size in cm</b>                       |      |           |                 |
| > 2 vs. ≤ 2                                   | 1.22 | 1.00–1.48 | 0.055           |
| <b>Positive lymph nodes (number)</b>          |      |           |                 |
| ≥ 4 vs. 0–3                                   | 0.58 | 0.46–0.72 | < 0.001         |
| <b>Histological grade</b>                     |      |           |                 |
| III vs. I–II                                  | 1.04 | 0.85–1.28 | 0.72            |
| <b>Histological type</b>                      |      |           | 0.13            |
| Invasive lobular vs. Invasive ductal          | 0.70 | 0.52–0.96 | 0.12            |
| Mixed vs. Invasive ductal                     | 0.81 | 0.54–1.20 | 0.66            |
| Other vs. Invasive ductal                     | 1.00 | 0.63–1.59 | 0.45            |
| <b>Surgery (binary)</b>                       |      |           |                 |
| Other vs. MRM                                 | 1.16 | 0.93–1.46 | 0.19            |
| <b>Hormonotherapy</b>                         |      |           |                 |
| Yes vs. No                                    | 0.75 | 0.52–1.10 | 0.14            |
| <b>Radiotherapy</b>                           |      |           |                 |
| Yes vs. No                                    | 1.37 | 1.05–1.78 | 0.021           |
| <b>ER/PgR central</b>                         |      |           |                 |
| Positive vs. Negative                         | 1.47 | 1.08–2.01 | 0.016           |
| <b>ER/PgR local</b>                           |      |           |                 |
| Positive vs. Negative                         | 1.09 | 0.73–1.63 | 0.67            |
| <b>EGFR central</b>                           |      |           |                 |
| Positive vs. Negative                         | 1.29 | 0.93–1.78 | 0.13            |
| <b>CK5 central</b>                            |      |           |                 |
| Positive vs. Negative                         | 0.92 | 0.63–1.33 | 0.64            |
| <b>HER2 IHC local</b>                         |      |           |                 |
| Overexpression vs. no overexpression          | 0.81 | 0.61–1.07 | 0.13            |
| <b>HER2 status central</b>                    |      |           |                 |
| Positive vs. Negative                         | 1.29 | 0.95–1.75 | 0.11            |

Notes: MRM: modified radical mastectomy; IHC: Immunohistochemistry.

### ROC Curve for Model

Area Under the Curve = 0.6106

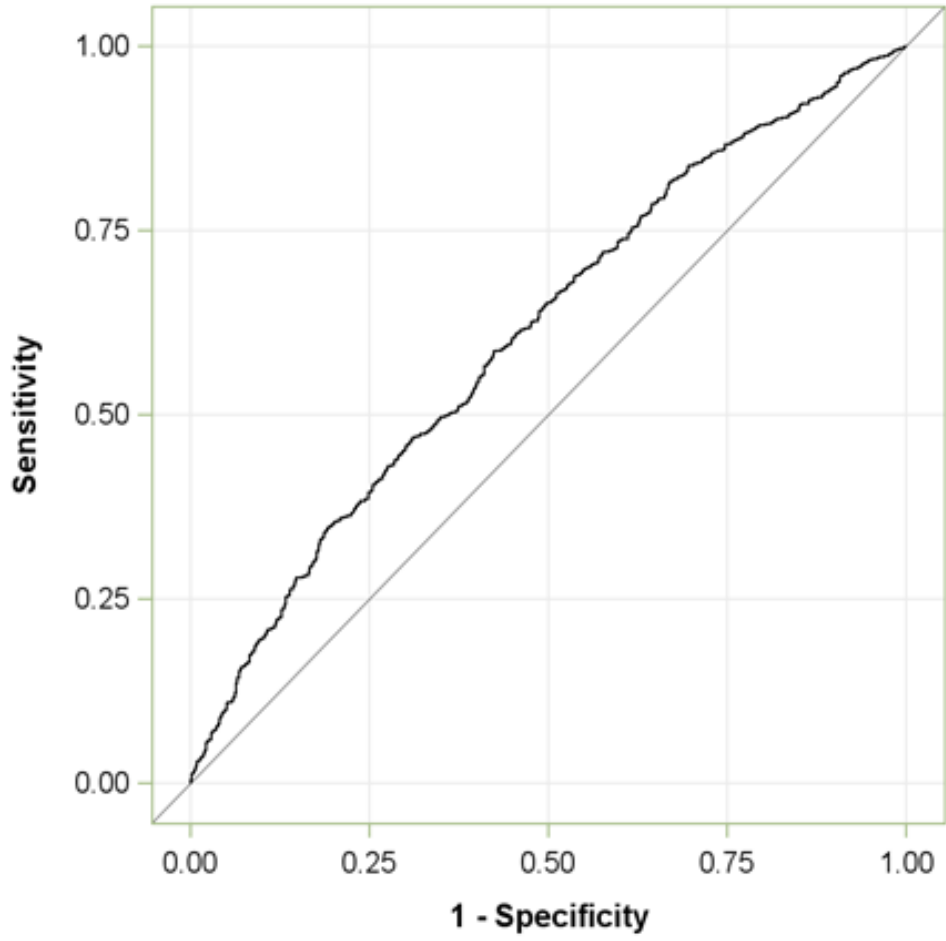

**Supplementary Table S13: Comparison between the 1766 patients with informative NGS data vs. the 1585 patients with informative p53 IHC**

| Odds ratio estimates                          |      |           |                 |
|-----------------------------------------------|------|-----------|-----------------|
| Effect                                        | OR   | 95% CI    | Wald's <i>p</i> |
| <b>CEN17 copies (incr. by 1)</b>              |      |           |                 |
|                                               | 1.39 | 1.02–1.90 | 0.037           |
| <b>Ki67 (% of positive cells, incr. by 5)</b> |      |           |                 |
|                                               | 1.09 | 1.02–1.16 | 0.010           |
| <b>Age (years)</b>                            |      |           |                 |
| > 50 vs. ≤ 50                                 | 1.37 | 0.58–3.22 | 0.47            |
| <b>Menopausal status</b>                      |      |           |                 |
| Post vs. Pre                                  | 0.65 | 0.28–1.52 | 0.32            |
| <b>Tumor size in cm</b>                       |      |           |                 |
| > 2 vs. ≤ 2                                   | 1.13 | 0.68–1.89 | 0.63            |
| <b>Positive lymph nodes</b>                   |      |           |                 |
| ≥ 4 vs. 0–3                                   | 0.66 | 0.37–1.18 | 0.16            |
| <b>Histological grade</b>                     |      |           |                 |
| III vs. I–II                                  | 1.77 | 1.02–3.07 | 0.041           |
| <b>Histological type</b>                      |      |           | 0.40            |
| Invasive lobular vs. Invasive ductal          | 1.49 | 0.65–3.45 | 0.90            |
| Mixed vs. Invasive ductal                     | 0.75 | 0.31–1.84 | 0.14            |
| Other vs. Invasive ductal                     | 3.60 | 0.48–26.9 | 0.23            |
| <b>Surgery (binary)</b>                       |      |           |                 |
| Other vs. MRM                                 | 1.35 | 0.74–2.47 | 0.32            |
| <b>Hormonotherapy</b>                         |      |           |                 |
| Yes vs. No                                    | 1.05 | 0.40–2.77 | 0.93            |
| <b>Radiotherapy</b>                           |      |           |                 |
| Yes vs. No                                    | 1.44 | 0.74–2.79 | 0.29            |
| <b>ER/PgR central</b>                         |      |           |                 |
| Positive vs. Negative                         | 1.21 | 0.51–2.87 | 0.67            |
| <b>ER/PgR local</b>                           |      |           |                 |
| Positive vs. Negative                         | 1.02 | 0.35–3.00 | 0.97            |
| <b>EGFR central</b>                           |      |           |                 |
| Positive vs. Negative                         | 0.80 | 0.35–1.85 | 0.60            |
| <b>CK5 central</b>                            |      |           |                 |
| Positive vs. Negative                         | 1.76 | 0.57–5.47 | 0.33            |
| <b>HER2 IHC local</b>                         |      |           |                 |
| Overexpression vs. no overexpression          | 0.82 | 0.40–1.65 | 0.57            |
| <b>HER2 status central</b>                    |      |           |                 |
| Positive vs. Negative                         | 1.30 | 0.58–2.93 | 0.52            |

Notes: MRM: modified radical mastectomy; IHC: Immunohistochemistry.

**ROC Curve for Model**  
Area Under the Curve = 0.7078

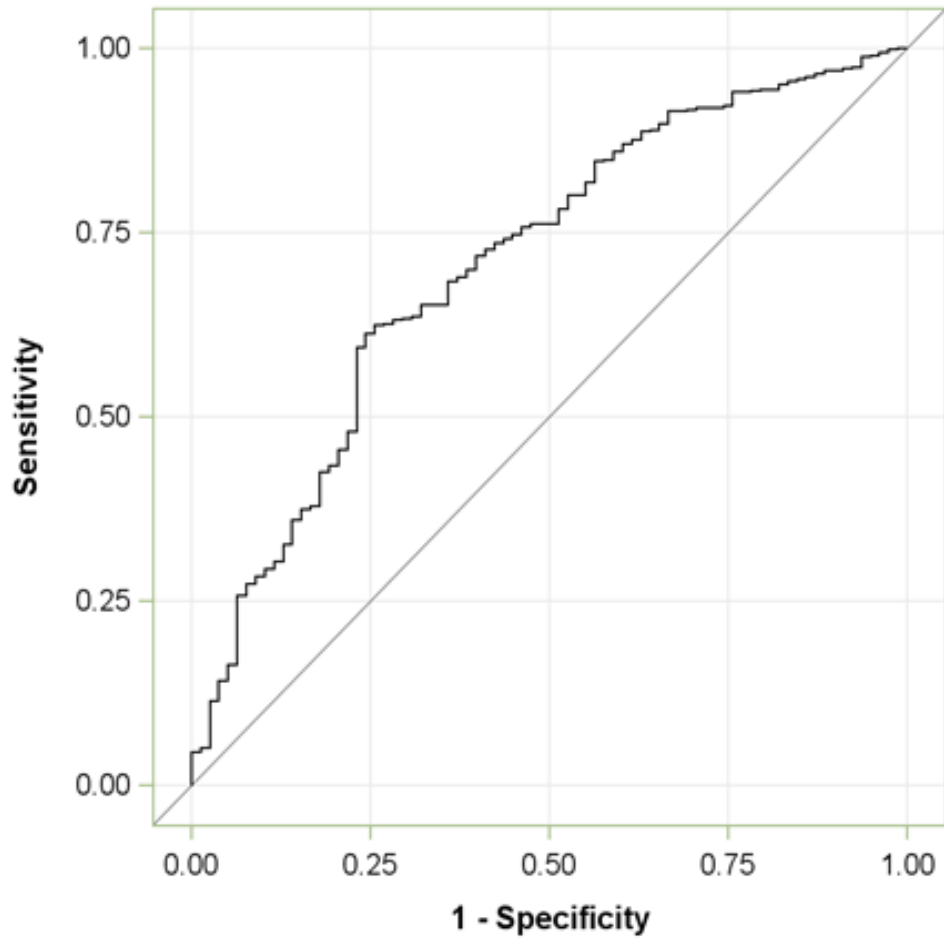

Supplement: oncotarget-07-32731-s001.pdf [file oncotarget-07-32731-s001.pdf]
