# Supplementary material for: TP53 mutations and protein immunopositivity may predict for poor outcome but also for trastuzumab benefit in patients with early breast cancer treated in the adjuvant setting
Source: PubMed Central journal article supplement (PMC5078047; doi:10.18632/oncotarget.9022), 2016-04-26
Supplement: oncotarget-07-32731-s002.pdf [file oncotarget-07-32731-s002.pdf]

Table S1: Associations of TP53 and PIK3CA mutations with clinicopathological variables.

|                                          | TP53 MUTATIONS |              |         | TP53 MUT DOMAINS |              |              |              |         | PIK3CA MUTATIONS |              |         | PIK3CA MUT DOMAINS |              |              |         |
|------------------------------------------|----------------|--------------|---------|------------------|--------------|--------------|--------------|---------|------------------|--------------|---------|--------------------|--------------|--------------|---------|
|                                          | NO             | YES          | p-value | NONE             | TAD          | DBD          | TETRA        | p-value | NO               | YES          | p-value | NONE               | HELICAL      | KINASE       | p-value |
| <b>Patients</b>                          |                |              |         |                  |              |              |              |         |                  |              |         |                    |              |              |         |
| N                                        | 1.386          | 380          |         | 1.386            | 81           | 225          | 74           |         | 1.308            | 458          |         | 1.308              | 191          | 265          |         |
| <b>Age (years)</b>                       |                |              |         |                  |              |              |              |         |                  |              |         |                    |              |              |         |
| Median                                   | 52,9           | 53,1         | 0,39    | 52,9             | 53,5         | 52,4         | 55,6         | 0,58    | 52,9             | 53           | 0,69    | 52,9               | 51,9         | 54,1         | 0,66    |
| Min-Max                                  | (22.4-82.9)    | (21.0-76.8)  |         | (22.4-82.9)      | (30.6-76.7)  | (21.0-76.8)  | (25.4-75.0)  |         | (23.8-82.9)      | (21.0-77.7)  |         | (21.0-82.9)        | (31.3-75.7)  | (22.4-77.7)  |         |
| <b>Tumor size</b>                        |                |              |         |                  |              |              |              |         |                  |              |         |                    |              |              |         |
| Median                                   | 2,5            | 2,5          | 0,064   | 2,5              | 2,9          | 2,6          | 2,4          | 0,14    | 2,5              | 2,5          | 0,74    | 2,5                | 2,5          | 2,5          | 0,81    |
| Min-Max                                  | (0.0-14.8)     | (0.0-12.0)   |         | (0.0-14.8)       | (0.8-12.0)   | (0.5-10.5)   | (0.0-8.0)    |         | (0.0-14.8)       | (0.0-11.5)   |         | (0.0-14.8)         | (0.0-9.5)    | (0.0-11.5)   |         |
| <b>Ki67</b>                              |                |              |         |                  |              |              |              |         |                  |              |         |                    |              |              |         |
| Median                                   | 18             | 35           | <0.001  | 18               | 39           | 35           | 37,5         | <0.001  | 25               | 16           | <0.001  | 25                 | 13           | 20           | <0.001  |
| Min-Max                                  | (0.0-100.0)    | (0.0-100.0)  |         | (0.0-100.0)      | (1.0-100.0)  | (0.0-100.0)  | (0.0-98.0)   |         | (0.0-100.0)      | (0.0-95.0)   |         | (0.0-100.0)        | (0.0-85.0)   | (0.0-95.0)   |         |
| <b>CEN17 copies</b>                      |                |              |         |                  |              |              |              |         |                  |              |         |                    |              |              |         |
| Median                                   | 2              | 2,2          | <0.001  | 2                | 2,4          | 2,2          | 2,2          | 0,005   | 2                | 2            | 0,40    | 2                  | 2            | 2,1          | 0,60    |
| Min-Max                                  | (0.7-17.5)     | (0.6-13.8)   |         | (0.7-17.5)       | (1.0-10.3)   | (1.0-13.8)   | (0.6-5.2)    |         | (0.6-17.5)       | (1.0-11.4)   |         | (0.6-17.5)         | (1.0-11.4)   | (1.0-7.7)    |         |
|                                          | <b>N (%)</b>   | <b>N (%)</b> |         | <b>N (%)</b>     | <b>N (%)</b> | <b>N (%)</b> | <b>N (%)</b> |         | <b>N (%)</b>     | <b>N (%)</b> |         | <b>N (%)</b>       | <b>N (%)</b> | <b>N (%)</b> |         |
| <b>Age</b>                               |                |              |         |                  |              |              |              |         |                  |              |         |                    |              |              |         |
| ≤50                                      | 572 (41.3)     | 152 (40.2)   | 0,71    | 572 (41.3)       | 34 (42.5)    | 95 (42.2)    | 23 (31.5)    | 0,40    | 539 (41.3)       | 185 (40.4)   | 0,74    | 539 (41.3)         | 79 (41.4)    | 105 (39.6)   | 0,88    |
| >50                                      | 814 (58.7)     | 226 (59.8)   |         | 814 (58.7)       | 46 (57.5)    | 130 (57.8)   | 50 (68.5)    |         | 767 (58.7)       | 273 (59.6)   |         | 767 (58.7)         | 112 (58.6)   | 160 (60.4)   |         |
| <b>Menopausal status</b>                 |                |              |         |                  |              |              |              |         |                  |              |         |                    |              |              |         |
| Postmenopausal                           | 746 (53.8)     | 206 (54.5)   | 0,82    | 746 (53.8)       | 41 (51.3)    | 120 (53.3)   | 45 (61.6)    | 0,57    | 714 (54.7)       | 238 (52.0)   | 0,32    | 714 (54.7)         | 90 (47.1)    | 147 (55.5)   | 0,13    |
| Premenopausal                            | 640 (46.2)     | 172 (45.5)   |         | 640 (46.2)       | 39 (48.8)    | 105 (46.7)   | 28 (38.4)    |         | 592 (45.3)       | 220 (48.0)   |         | 592 (45.3)         | 101 (52.9)   | 118 (44.5)   |         |
| <b>Tumor size</b>                        |                |              |         |                  |              |              |              |         |                  |              |         |                    |              |              |         |
| ≤2                                       | 516 (37.3)     | 123 (32.5)   | 0,091   | 516 (37.3)       | 21 (26.3)    | 76 (33.8)    | 26 (35.6)    | 0,20    | 463 (35.5)       | 176 (38.4)   | 0,26    | 463 (35.5)         | 74 (38.7)    | 102 (38.5)   | 0,49    |
| >2                                       | 869 (62.7)     | 255 (67.5)   |         | 869 (62.7)       | 59 (73.8)    | 149 (66.2)   | 47 (64.4)    |         | 842 (64.5)       | 282 (61.6)   |         | 842 (64.5)         | 117 (61.3)   | 163 (61.5)   |         |
| <b>Positive lymph nodes</b>              |                |              |         |                  |              |              |              |         |                  |              |         |                    |              |              |         |
| 0-3                                      | 833 (60.1)     | 224 (59.3)   | 0,77    | 833 (60.1)       | 44 (55.0)    | 138 (61.3)   | 42 (57.5)    | 0,76    | 766 (58.7)       | 291 (63.5)   | 0,066   | 766 (58.7)         | 111 (58.1)   | 178 (67.2)   | 0,031   |
| ≥4                                       | 553 (39.9)     | 154 (40.7)   |         | 553 (39.9)       | 36 (45.0)    | 87 (38.7)    | 31 (42.5)    |         | 540 (41.3)       | 167 (36.5)   |         | 540 (41.3)         | 80 (41.9)    | 87 (32.8)    |         |
| <b>Histological grade</b>                |                |              |         |                  |              |              |              |         |                  |              |         |                    |              |              |         |
| I                                        | 105 (7.6)      | 8 (2.1)      | <0.001  | 105 (7.6)        | 1 (1.3)      | 7 (3.1)      |              | <0.001  | 61 (4.7)         | 52 (11.4)    | <0.001  | 61 (4.7)           | 22 (11.6)    | 30 (11.3)    | <0.001  |
| II                                       | 682 (49.4)     | 110 (29.2)   |         | 682 (49.4)       | 23 (29.1)    | 68 (30.2)    | 19 (26.0)    |         | 569 (43.8)       | 223 (48.8)   |         | 569 (43.8)         | 98 (51.6)    | 125 (47.2)   |         |
| III                                      | 593 (43.0)     | 259 (68.7)   |         | 593 (43.0)       | 55 (69.6)    | 150 (66.7)   | 54 (74.0)    |         | 670 (51.5)       | 182 (39.8)   |         | 670 (51.5)         | 70 (36.8)    | 110 (41.5)   |         |
| <b>Histological type</b>                 |                |              |         |                  |              |              |              |         |                  |              |         |                    |              |              |         |
| Invasive ductal                          | 1,111 (80.2)   | 331 (87.6)   | <0.001  | 1,111 (80.2)     | 70 (87.5)    | 200 (88.9)   | 61 (83.6)    | 0,001   | 1,082 (82.8)     | 360 (78.6)   | 0,001   | 1,082 (82.8)       | 147 (77.0)   | 211 (79.6)   | 0,008   |
| Invasive lobular                         | 141 (10.2)     | 16 (4.2)     |         | 141 (10.2)       | 4 (5.0)      | 9 (4.0)      | 3 (4.1)      |         | 100 (7.7)        | 57 (12.4)    |         | 100 (7.7)          | 26 (13.6)    | 31 (11.7)    |         |
| Mixed                                    | 75 (5.4)       | 8 (2.1)      |         | 75 (5.4)         | 3 (3.8)      | 4 (1.8)      | 1 (1.4)      |         | 55 (4.2)         | 28 (6.1)     |         | 55 (4.2)           | 12 (6.3)     | 16 (6.0)     |         |
| Other                                    | 59 (4.3)       | 23 (6.1)     |         | 59 (4.3)         | 3 (3.8)      | 12 (5.3)     | 8 (11.0)     |         | 69 (5.3)         | 13 (2.8)     |         | 69 (5.3)           | 6 (3.1)      | 7 (2.6)      |         |
| <b>Surgery (binary)</b>                  |                |              |         |                  |              |              |              |         |                  |              |         |                    |              |              |         |
| MRM                                      | 801 (57.8)     | 208 (55.0)   | 0,34    | 801 (57.8)       | 44 (55.0)    | 123 (54.7)   | 41 (56.2)    | 0,81    | 744 (57.0)       | 265 (57.9)   | 0,74    | 744 (57.0)         | 110 (57.6)   | 155 (58.5)   | 0,90    |
| Other                                    | 585 (42.2)     | 170 (45.0)   |         | 585 (42.2)       | 36 (45.0)    | 102 (45.3)   | 32 (43.8)    |         | 562 (43.0)       | 193 (42.1)   |         | 562 (43.0)         | 81 (42.4)    | 110 (41.5)   |         |
| <b>Hormonotherapy</b>                    |                |              |         |                  |              |              |              |         |                  |              |         |                    |              |              |         |
| No                                       | 258 (18.7)     | 145 (38.5)   | <0.001  | 258 (18.7)       | 36 (45.0)    | 78 (34.7)    | 31 (43.1)    | <0.001  | 332 (25.5)       | 71 (15.5)    | <0.001  | 332 (25.5)         | 23 (12.0)    | 47 (17.7)    | <0.001  |
| Yes                                      | 1,124 (81.3)   | 232 (61.5)   |         | 1,124 (81.3)     | 44 (55.0)    | 147 (65.3)   | 41 (56.9)    |         | 969 (74.5)       | 387 (84.5)   |         | 969 (74.5)         | 168 (88.0)   | 218 (82.3)   |         |
| <b>Radiotherapy</b>                      |                |              |         |                  |              |              |              |         |                  |              |         |                    |              |              |         |
| No                                       | 341 (25.3)     | 73 (19.7)    | 0,026   | 341 (25.3)       | 13 (16.7)    | 47 (21.4)    | 13 (18.1)    | 0,12    | 299 (23.6)       | 115 (25.7)   | 0,37    | 299 (23.6)         | 45 (24.5)    | 70 (26.7)    | 0,56    |
| Yes                                      | 1,005 (74.7)   | 297 (80.3)   |         | 1,005 (74.7)     | 65 (83.3)    | 173 (78.6)   | 59 (81.9)    |         | 969 (76.4)       | 333 (74.3)   |         | 969 (76.4)         | 139 (75.5)   | 192 (73.3)   |         |
| <b>Subtypes, entire cohort</b>           |                |              |         |                  |              |              |              |         |                  |              |         |                    |              |              |         |
| Luminal A                                | 539 (38.9)     | 49 (12.9)    | <0.001  | 539 (38.9)       | 10 (12.3)    | 31 (13.8)    | 8 (11.0)     | <0.001  | 393 (30.1)       | 195 (42.6)   | <0.001  | 393 (30.1)         | 100 (52.4)   | 94 (35.5)    | <0.001  |
| Luminal B                                | 369 (26.6)     | 94 (24.8)    |         | 369 (26.6)       | 19 (23.5)    | 62 (27.6)    | 13 (17.8)    |         | 327 (25.0)       | 136 (29.7)   |         | 327 (25.0)         | 45 (23.6)    | 91 (34.3)    |         |
| Luminal HER2                             | 240 (17.3)     | 78 (20.6)    |         | 240 (17.3)       | 14 (17.3)    | 49 (21.8)    | 15 (20.5)    |         | 254 (19.4)       | 64 (14.0)    |         | 254 (19.4)         | 24 (12.6)    | 40 (15.1)    |         |
| HER2-Enriched                            | 88 (6.3)       | 73 (19.3)    |         | 88 (6.3)         | 20 (24.7)    | 42 (18.7)    | 11 (15.1)    |         | 131 (10.0)       | 30 (6.6)     |         | 131 (10.0)         | 11 (5.8)     | 19 (7.2)     |         |
| TNBC                                     | 150 (10.8)     | 85 (22.4)    |         | 150 (10.8)       | 18 (22.2)    | 41 (18.2)    | 26 (35.6)    |         | 202 (15.5)       | 33 (7.2)     |         | 202 (15.5)         | 11 (5.8)     | 21 (7.9)     |         |
| <b>Subtypes, entire cohort, combined</b> |                |              |         |                  |              |              |              |         |                  |              |         |                    |              |              |         |
| Luminal A/B                              | 908 (65.5)     | 143 (37.7)   | <0.001  | 908 (65.5)       | 29 (35.8)    | 93 (41.3)    | 21 (28.8)    | <0.001  | 720 (55.1)       | 331 (72.3)   | <0.001  | 720 (55.1)         | 145 (75.9)   | 185 (69.8)   | <0.001  |
| HER2-positive                            | 328 (23.7)     | 151 (39.8)   |         | 328 (23.7)       | 34 (42.0)    | 91 (40.4)    | 26 (35.6)    |         | 385 (29.5)       | 94 (20.5)    |         | 385 (29.5)         | 35 (18.3)    | 59 (22.3)    |         |
| TNBC                                     | 150 (10.8)     | 85 (22.4)    |         | 150 (10.8)       | 18 (22.2)    | 41 (18.2)    | 26 (35.6)    |         | 202 (15.5)       | 33 (7.2)     |         | 202 (15.5)         | 11 (5.8)     | 21 (7.9)     |         |
| <b>Subtypes concordant*</b>              |                |              |         |                  |              |              |              |         |                  |              |         |                    |              |              |         |
| Luminal A                                | 467 (46.7)     | 39 (15.7)    | <0.001  | 467 (46.7)       | 10 (17.2)    | 23 (16.2)    | 6 (12.2)     | <0.001  | 336 (37.3)       | 170 (49.0)   | <0.001  | 336 (37.3)         | 85 (60.3)    | 84 (41.2)    | <0.001  |
| Luminal B                                | 314 (31.4)     | 74 (29.7)    |         | 314 (31.4)       | 16 (27.6)    | 48 (33.8)    | 10 (20.4)    |         | 269 (29.9)       | 119 (34.3)   |         | 269 (29.9)         | 38 (27.0)    | 81 (39.7)    |         |
| Luminal-HER2                             | 103 (10.3)     | 47 (18.9)    |         | 103 (10.3)       | 8 (13.8)     | 30 (21.1)    | 9 (18.4)     |         | 124 (13.8)       | 26 (7.5)     |         | 124 (13.8)         | 9 (6.4)      | 17 (8.3)     |         |
| HER2-Enriched                            | 45 (4.5)       | 46 (18.5)    |         | 45 (4.5)         | 14 (24.1)    | 24 (16.9)    | 8 (16.3)     |         | 77 (8.5)         | 14 (4.0)     |         | 77 (8.5)           | 4 (2.8)      | 10 (4.9)     |         |
| TNBC                                     | 70 (7.0)       | 43 (17.3)    |         | 70 (7.0)         | 10 (17.2)    | 17 (12.0)    | 16 (32.7)    |         | 95 (10.5)        | 18 (5.2)     |         | 95 (10.5)          | 5 (3.5)      | 12 (5.9)     |         |
| <b>Subtypes concordant combined</b>      |                |              |         |                  |              |              |              |         |                  |              |         |                    |              |              |         |
| Luminal A/B                              | 781 (78.2)     | 113 (45.4)   | <0.001  | 781 (78.2)       | 26 (44.8)    | 71 (50.0)    | 16 (32.7)    | <0.001  | 605 (67.1)       | 289 (83.3)   | <0.001  | 605 (67.1)         | 123 (87.2)   | 165 (80.9)   | <0.001  |
| HER2-positive                            | 148 (14.8)     | 93 (37.3)    |         | 148 (14.8)       | 22 (37.9)    | 54 (38.0)    | 17 (34.7)    |         | 201 (22.3)       | 40 (11.5)    |         | 201 (22.3)         | 13 (9.2)     | 27 (13.2)    |         |
| TNBC                                     | 70 (7.0)       | 43 (17.3)    |         | 70 (7.0)         | 10 (17.2)    | 17 (12.0)    | 16 (32.7)    |         | 95 (10.5)        | 18 (5.2)     |         | 95 (10.5)          | 5 (3.5)      | 12 (5.9)     |         |
| <b>Basal</b>                             |                |              |         |                  |              |              |              |         |                  |              |         |                    |              |              |         |
| Basal                                    | 213 (16.2)     | 155 (42.5)   | <0.001  | 213 (16.2)       | 37 (48.1)    | 85 (39.0)    | 33 (47.1)    | <0.001  | 301 (24.4)       | 67 (15.0)    | <0.001  | 301 (24.4)         | 22 (11.8)    | 44 (17.1)    | <0.001  |
| Non-Basal                                | 1,105 (83.8)   | 210 (57.5)   |         | 1,105 (83.8)     | 40 (51.9)    | 133 (61.0)   | 37 (52.9)    |         | 935 (75.6)       | 380 (85.0)   |         | 935 (75.6)         | 165 (88.2)   | 214 (82.9)   |         |
| <b>RandomGroup</b>                       |                |              |         |                  |              |              |              |         |                  |              |         |                    |              |              |         |
| E-CMF                                    | 58 (4.2)       | 28 (7.4)     | 0,020   | 58 (4.2)         | 5 (6.2)      | 19 (8.4)     | 4 (5.4)      | 0,069   | 64 (4.9)         | 22 (4.8)     | 0,29    | 64 (4.9)           | 10 (5.2)     | 12 (4.5)     | 0,24    |
| E-CMF-Doc                                | 140 (10.1)     | 42 (11.1)    |         | 140 (10.1)       | 8 (9.9)      | 31 (13.8)    | 3 (4.1)      |         | 139 (10.6)       | 43 (9.4)     |         | 139 (10.6)         | 22 (11.5)    | 21 (7.9)     |         |
| E-CMF-T                                  | 152 (11.0)     | 47 (12.4)    |         | 152 (11.0)       | 28 (12.4)    | 28 (12.4)    | 9 (12.2)     |         | 146 (11.2)       | 53 (11.6)    |         | 146 (11.2)         | 27 (14.1)    | 25 (9.4)     |         |
| E-T-CMF                                  | 834 (60.2)     | 225 (59.2)   |         | 834 (60.2)       | 51 (63.0)    | 125 (55.6)   | 49 (66.2)    |         | 769 (58.8)       | 290 (63.3)   |         | 769 (58.8)         | 110 (57.6)   | 179 (67.5)   |         |
| ET-CMF                                   | 202 (14.6)     | 38 (10.0)    |         | 202 (14.6)       | 7 (8.6)      | 22 (9.8)     | 9 (12.2)     |         | 190 (14.5)       | 50 (10.9)    |         | 190 (14.5)         | 22 (11.5)    | 28 (10.6)    |         |

Notes: MRM: modified radical mastectomy; \*: same ER/PgR and HER2 status upon local and central testing; TAD: transactivation domain; DBD: DNA binding domain; TETRA: oligomerization domain.
