# Supplementary material for: TP53 mutations and protein immunopositivity may predict for poor outcome but also for trastuzumab benefit in patients with early breast cancer treated in the adjuvant setting
Source: PubMed Central journal article supplement (PMC5078047; doi:10.18632/oncotarget.9022), 2016-04-26
Supplement: oncotarget-07-32731-s003.pdf [file oncotarget-07-32731-s003.pdf]

Table S5: Univariate Cox analysis for clinicopathological parameters in the entire cohort against disease-free survival.

| Parameter                   | ENTIRE COHORT |             |      |           |          | LUMINAL A/B |            |      |           |          | TNBC        |           |      |            | HER2-positive, pre-trastuzumab |            |           |      |            | HER2-positive, post-trastuzumab |             |           |      |           |          |  |
|-----------------------------|---------------|-------------|------|-----------|----------|-------------|------------|------|-----------|----------|-------------|-----------|------|------------|--------------------------------|------------|-----------|------|------------|---------------------------------|-------------|-----------|------|-----------|----------|--|
|                             | N patients    | N events    | HR   | 95% CI    | Wald's p | N patients  | N events   | HR   | 95% CI    | Wald's p | N patients  | N events  | HR   | 95% CI     | Wald's p                       | N patients | N events  | HR   | 95% CI     | Wald's p                        | N patients  | N events  | HR   | 95% CI    | Wald's p |  |
| <b>Age (years)</b>          |               |             |      |           |          |             |            |      |           |          |             |           |      |            |                                |            |           |      |            |                                 |             |           |      |           |          |  |
| >50 vs. ≤50                 | 1040 vs. 724  | 242 vs. 147 | 1,18 | 0.96-1.45 | 0,110    | 620 vs. 432 | 132 vs. 86 | 1,11 | 0.84-1.45 | 0,47     | 136 vs. 99  | 38 vs. 21 | 1,38 | 0.81-2.36  | 0,23                           | 117 vs. 85 | 48 vs. 26 | 1,41 | 0.87-2.27  | 0,16                            | 167 vs. 110 | 24 vs. 14 | 1,07 | 0.55-2.07 | 0,85     |  |
| <b>Histological grade</b>   |               |             |      |           | 0,004    |             |            |      |           | 0,001    |             |           |      |            | 0,049                          |            |           |      |            | 0,64                            |             |           |      |           | 0,66     |  |
| II vs. I                    | 792 vs. 113   | 171 vs. 11  | 2,28 | 1.24-4.20 | 0,008    | 559 vs. 98  | 109 vs. 8  | 2,39 | 1.17-4.9  | 0,017    | 50 vs. 5    | 20 vs. 1  | 1,94 | 0.26-14.48 | 0,52                           | 81 vs. 6   | 30 vs. 1  | 2,38 | 0.33-17.48 | 0,39                            | 103 vs. 4   | 12 vs. 1  | 0,49 | 0.06-3.77 | 0,49     |  |
| III vs. I                   | 852 vs. 113   | 207 vs. 11  | 2,66 | 1.45-4.88 | 0,002    | 389 vs. 98  | 101 vs. 8  | 3,31 | 1.61-6.79 | 0,001    | 180 vs. 5   | 38 vs. 1  | 0,99 | 0.14-7.19  | 0,99                           | 115 vs. 6  | 43 vs. 1  | 2,56 | 0.35-18.6  | 0,35                            | 169 vs. 4   | 25 vs. 1  | 0,64 | 0.09-4.69 | 0,66     |  |
| <b>Histological type</b>    |               |             |      |           | 0,042    |             |            |      |           | 0,28     |             |           |      |            | 0,37                           |            |           |      |            | 0,60                            |             |           |      |           | 0,46     |  |
| Invasive lobular vs. Ductal | 157 vs. 1442  | 34 vs. 316  | 0,92 | 0.64-1.31 | 0,640    | 133 vs. 817 | 29 vs. 165 | 1,01 | 0.68-1.5  | 0,97     | 12 vs. 187  | 3 vs. 50  | 0,82 | 0.25-2.65  | 0,74                           | 6 vs. 175  | 2 vs. 64  | 0,89 | 0.22-3.62  | 0,87                            | 6 vs. 265   | 0 vs. 37  | 0,47 | 0.03-8.38 | 0,60     |  |
| Mixed vs. Ductal            | 83 vs. 1442   | 28 vs. 316  | 1,49 | 1.01-2.19 | 0,044    | 66 vs. 817  | 20 vs. 165 | 1,40 | 0.88-2.22 | 0,16     | 5 vs. 187   | 2 vs. 50  | 1,76 | 0.43-7.25  | 0,43                           | 9 vs. 175  | 5 vs. 64  | 1,69 | 0.68-4.21  | 0,26                            | 3 vs. 265   | 1 vs. 37  | 3,64 | 0.68-19.5 | 0,13     |  |
| Other vs. Ductal            | 82 vs. 1442   | 11 vs. 316  | 0,57 | 0.31-1.04 | 0,065    | 36 vs. 817  | 4 vs. 165  | 0,52 | 0.19-1.41 | 0,20     | 31 vs. 187  | 4 vs. 50  | 0,46 | 0.16-1.26  | 0,13                           | 12 vs. 175 | 3 vs. 64  | 0,66 | 0.21-2.11  | 0,48                            | 3 vs. 265   | 0 vs. 37  | 1,14 | 0.07-20.0 | 0,93     |  |
| <b>Subtypes</b>             |               |             |      |           | 0,089    |             |            |      |           |          |             |           |      |            |                                |            |           |      |            |                                 |             |           |      |           |          |  |
| Luminal B vs. Luminal A     | 463 vs. 588   | 115 vs. 103 | 1,38 | 1.06-1.81 | 0,017    | -           | -          | -    | -         | -        | -           | -         | -    | -          | -                              | -          | -         | -    | -          | -                               | -           | -         | -    | -         | -        |  |
| Luminal HER2 vs. Luminal A  | 318 vs. 588   | 78 vs. 103  | 1,33 | 0.99-1.79 | 0,056    | -           | -          | -    | -         | -        | -           | -         | -    | -          | -                              | -          | -         | -    | -          | -                               | -           | -         | -    | -         | -        |  |
| HER2-Enriched vs. Luminal A | 161 vs. 588   | 34 vs. 103  | 1,25 | 0.85-1.84 | 0,260    | -           | -          | -    | -         | -        | -           | -         | -    | -          | -                              | -          | -         | -    | -          | -                               | -           | -         | -    | -         | -        |  |
| TNBC vs. Luminal A          | 235 vs. 588   | 59 vs. 103  | 1,47 | 1.06-2.02 | 0,019    | -           | -          | -    | -         | -        | -           | -         | -    | -          | -                              | -          | -         | -    | -          | -                               | -           | -         | -    | -         | -        |  |
| <b>Hormonotherapy</b>       |               |             |      |           |          |             |            |      |           |          |             |           |      |            |                                |            |           |      |            |                                 |             |           |      |           |          |  |
| Yes vs. No                  | 1356 vs. 403  | 290 vs. 97  | 0,78 | 0.62-0.98 | 0,032    | 1008 vs. 43 | 206 vs. 11 | 0,69 | 0.37-1.26 | 0,22     | 33 vs. 199  | 8 vs. 50  | 0,74 | 0.34-1.59  | 0,44                           | 152 vs. 49 | 55 vs. 19 | 0,80 | 0.47-1.34  | 0,39                            | 164 vs. 113 | 21 vs. 17 | 0,80 | 0.42-1.52 | 0,50     |  |
| <b>Menopausal status</b>    |               |             |      |           |          |             |            |      |           |          |             |           |      |            |                                |            |           |      |            |                                 |             |           |      |           |          |  |
| Post vs. Premenopausal      | 952 vs. 812   | 221 vs. 168 | 1,15 | 0.94-1.40 | 0,180    | 566 vs. 486 | 125 vs. 93 | 1,20 | 0.92-1.58 | 0,18     | 123 vs. 112 | 32 vs. 27 | 1,06 | 0.64-1.78  | 0,81                           | 107 vs. 95 | 42 vs. 32 | 1,22 | 0.77-1.94  | 0,39                            | 156 vs. 121 | 22 vs. 16 | 0,99 | 0.52-1.89 | 0,97     |  |
| <b>Positive lymph nodes</b> |               |             |      |           |          |             |            |      |           |          |             |           |      |            |                                |            |           |      |            |                                 |             |           |      |           |          |  |
| ≥4 vs. 0-3                  | 707 vs. 1057  | 249 vs. 140 | 2,72 | 2.21-3.35 | <0.001   | 425 vs. 627 | 142 vs. 76 | 2,75 | 2.08-3.64 | <0.001   | 82 vs. 153  | 33 vs. 26 | 2,49 | 1.48-4.17  | 0,001                          | 113 vs. 89 | 55 vs. 19 | 2,73 | 1.62-4.61  | <0.001                          | 88 vs. 189  | 19 vs. 19 | 2,32 | 1.23-4.4  | 0,010    |  |
| <b>Radiotherapy</b>         |               |             |      |           |          |             |            |      |           |          |             |           |      |            |                                |            |           |      |            |                                 |             |           |      |           |          |  |
| YES vs. NO                  | 1302 vs. 414  | 307 vs. 73  | 1,31 | 1.01-1.69 | 0,039    | 784 vs. 240 | 179 vs. 36 | 1,50 | 1.05-2.15 | 0,026    | 175 vs. 55  | 40 vs. 17 | 0,72 | 0.41-1.27  | 0,25                           | 144 vs. 47 | 57 vs. 13 | 1,49 | 0.82-2.73  | 0,19                            | 200 vs. 73  | 31 vs. 7  | 1,59 | 0.7-3.62  | 0,27     |  |
| <b>Tumor size</b>           |               |             |      |           |          |             |            |      |           |          |             |           |      |            |                                |            |           |      |            |                                 |             |           |      |           |          |  |
| >2 vs. ≤2 cm                | 1124 vs. 639  | 295 vs. 93  | 1,85 | 1.47-2.34 | <0.001   | 658 vs. 394 | 165 vs. 53 | 1,90 | 1.4-2.6   | <0.001   | 145 vs. 90  | 43 vs. 16 | 1,78 | 1-3.17     | 0,049                          | 158 vs. 43 | 64 vs. 9  | 2,36 | 1.17-4.75  | 0,016                           | 165 vs. 112 | 23 vs. 15 | 1,01 | 0.53-1.94 | 0,98     |  |

Notes: Luminal A/B: ER/PgR positive, HER2 negative.
