# Supplementary material for: TP53 mutations and protein immunopositivity may predict for poor outcome but also for trastuzumab benefit in patients with early breast cancer treated in the adjuvant setting
Source: PubMed Central journal article supplement (PMC5078047; doi:10.18632/oncotarget.9022), 2016-04-26
Supplement: oncotarget-07-32731-s004.pdf [file oncotarget-07-32731-s004.pdf]

**TABLE S11: Description of the 4 HeCOG trials for patients with operable high-risk breast cancer.**

| Trial                                                                                  | Accrual period | N     | n   | Treatment schedule                                                                                                                                                                                                                                                                                                                                                                                                                                                                                                                                                                                                                                                                                                                                                                                                                                                                                                                                                                                                                                                                                                                                                                                                                                                                                                                                                                                                                                                                            | Eligibility criteria                                                                                                                                                                                                                                                                                                                                                                                                                                                                                                                                                                                                                                                                                                                                                                                                                                                       | Reference                                                                                                                                                                                                                                                                                                               |
|----------------------------------------------------------------------------------------|----------------|-------|-----|-----------------------------------------------------------------------------------------------------------------------------------------------------------------------------------------------------------------------------------------------------------------------------------------------------------------------------------------------------------------------------------------------------------------------------------------------------------------------------------------------------------------------------------------------------------------------------------------------------------------------------------------------------------------------------------------------------------------------------------------------------------------------------------------------------------------------------------------------------------------------------------------------------------------------------------------------------------------------------------------------------------------------------------------------------------------------------------------------------------------------------------------------------------------------------------------------------------------------------------------------------------------------------------------------------------------------------------------------------------------------------------------------------------------------------------------------------------------------------------------------|----------------------------------------------------------------------------------------------------------------------------------------------------------------------------------------------------------------------------------------------------------------------------------------------------------------------------------------------------------------------------------------------------------------------------------------------------------------------------------------------------------------------------------------------------------------------------------------------------------------------------------------------------------------------------------------------------------------------------------------------------------------------------------------------------------------------------------------------------------------------------|-------------------------------------------------------------------------------------------------------------------------------------------------------------------------------------------------------------------------------------------------------------------------------------------------------------------------|
| HE10/97<br><br>Australian New Zealand Clinical Trials Registry<br>ACTRN12611000506998  | 1997 - 2000    | 595   | 309 | <b>E-T-CMF:</b> Epirubicin 110 mg/m <sup>2</sup> q 2 weeks x 3 followed by paclitaxel 250 mg/m <sup>2</sup> q 2 weeks x 3 followed by cyclophosphamide 840 mg/m <sup>2</sup> ; methotrexate 57 mg/m <sup>2</sup> ; fluorouracil 840 mg/m <sup>2</sup> (CMF) q 2 weeks x 3. GCSF support in all cycles. vs. <b>E-CMF:</b> Epirubicin 110 mg/m <sup>2</sup> q 2 weeks x 4 followed by CMF q 2 weeks x 4. GCSF support in all cycles.                                                                                                                                                                                                                                                                                                                                                                                                                                                                                                                                                                                                                                                                                                                                                                                                                                                                                                                                                                                                                                                            | Eligible were women with: histologically confirmed epithelial breast cancer; pathological stage T1-3 N1 M0 or T3 N0 M0 [14]; Eastern Cooperative Oncology Group performance status 0-1; normal cardiac function; and adequate bone marrow, hepatic and renal function.                                                                                                                                                                                                                                                                                                                                                                                                                                                                                                                                                                                                     | Fountzilas G, Skarlos D, et al. Postoperative dose-dense sequential chemotherapy with epirubicin, followed by CMF with or without paclitaxel, in patients with high-risk operable breast cancer: a randomized phase III study conducted by the Hellenic Cooperative Oncology Group. Ann Oncol. 2005 Nov;16(11):1762-71. |
|                                                                                        |                |       |     | <p>Patients with ER/PgR-positive tumors received tamoxifen 20 mg daily for five years. Premenopausal patients received additional treatment with an LH-RH analog for two years. All patients who underwent partial mastectomy or with tumors &gt;5 cm and/or with ≥4 infiltrated axillary nodes, irrespectively of the type of surgery, were irradiated. Radiation therapy and hormonal therapy were administered after the completion of chemotherapy.</p>                                                                                                                                                                                                                                                                                                                                                                                                                                                                                                                                                                                                                                                                                                                                                                                                                                                                                                                                                                                                                                   |                                                                                                                                                                                                                                                                                                                                                                                                                                                                                                                                                                                                                                                                                                                                                                                                                                                                            |                                                                                                                                                                                                                                                                                                                         |
| HE10/00<br><br>Australian New Zealand Clinical Trials Registry<br>ACTRN-12609001036202 | 2000 - 2005    | 1.086 | 782 | <b>E-T-CMF:</b> As in the HE10/97 trial. vs. <b>ET-CMF:</b> Epirubicin 83 mg/m <sup>2</sup> + Paclitaxel 187 mg/m <sup>2</sup> q 3 weeks x 4 followed by cyclophosphamide 840 mg/m <sup>2</sup> ; methotrexate 57 mg/m <sup>2</sup> ; fluorouracil 840 mg/m <sup>2</sup> (CMF) q 2 weeks x 3. GCSF support in all cycles.                                                                                                                                                                                                                                                                                                                                                                                                                                                                                                                                                                                                                                                                                                                                                                                                                                                                                                                                                                                                                                                                                                                                                                     | Eligible were women with: histologically confirmed epithelial breast cancer; pathological stage T1-4 N1-2 M0; Eastern Cooperative Oncology Group performance status 0-1; normal cardiac function and adequate bone marrow, hepatic and renal function.                                                                                                                                                                                                                                                                                                                                                                                                                                                                                                                                                                                                                     | Gogas H, Dafni U, et al. Postoperative dose-dense sequential versus concomitant administration of epirubicin and paclitaxel in patients with node-positive breast cancer: 5-year results of the Hellenic Cooperative Oncology Group HE 10/00 phase III Trial. Breast Cancer Res Treat. 2012 Apr;132(2):609-19.          |
|                                                                                        |                |       |     | <p>Premenopausal patients received hormonal therapy as in the HE10/97 trial. Postmenopausal patients received tamoxifen 20 mg daily for 2-3 years followed 2-3 years of daily exemestane 25 mg. Criteria for irradiation were the same as in the HE10/97 trial.</p>                                                                                                                                                                                                                                                                                                                                                                                                                                                                                                                                                                                                                                                                                                                                                                                                                                                                                                                                                                                                                                                                                                                                                                                                                           |                                                                                                                                                                                                                                                                                                                                                                                                                                                                                                                                                                                                                                                                                                                                                                                                                                                                            |                                                                                                                                                                                                                                                                                                                         |
| HE10/05<br><br>Australian New Zealand Clinical Trials Registry<br>ACTRN-12610000151033 | 2005 - 2008    | 990   | 793 | <b>E-T-CMF:</b> Epirubicin 110 mg/m <sup>2</sup> q 2 weeks x 3 followed by paclitaxel 200 mg/m <sup>2</sup> q 2 weeks x 3 followed by cyclophosphamide 840 mg/m <sup>2</sup> ; methotrexate 57 mg/m <sup>2</sup> ; fluorouracil 840 mg/m <sup>2</sup> (CMF) q 2 weeks x 3. GCSF support in all cycles.                                                                                                                                                                                                                                                                                                                                                                                                                                                                                                                                                                                                                                                                                                                                                                                                                                                                                                                                                                                                                                                                                                                                                                                        | Eligible women were older than 18 years with histologically confirmed node-positive (T1-3 N1 M0) or "intermediate risk" according to the 2005 St. Gallen criteria (node negative patients with at least one of the following features: pT > 2 cm, or histological and/or nuclear grade 2-3, or presence of peritumoral vascular invasion, or HER2 gene overexpression and/or amplification, or age <35 years) adenocarcinoma of the breast. Patients had to have breast-conserving surgery with tumor-free margins or modified radical mastectomy, adequate hematologic, hepatic and renal function, performance status of 0 to 1 of the Eastern Cooperative Oncology Group (ECOG) scale, without evidence of significant cardiac disease (a normal left ventricular ejection fraction [LVEF] demonstrated by a Multiple Gated Acquisition [MUGA] scan or echocardiogram). | Fountzilas G, Dafni U, et al. Dose-dense sequential adjuvant chemotherapy followed, as indicated, by trastuzumab for one year in patients with early breast cancer: first report at 5-year median follow-up of a Hellenic Cooperative Oncology Group randomized phase III trial. BMC Cancer. 2014 Jul 15;14:515.        |
|                                                                                        |                |       |     | <p>vs. <b>E-CMF-wD:</b> Epirubicin 110 mg/m<sup>2</sup> q 2 weeks x 3 followed by CMF q 2 weeks x 3 followed by weekly Docetaxel 35 mg/m<sup>2</sup> x 9</p> <p>vs. <b>E-CMF-wT</b> Epirubicin 110 mg/m<sup>2</sup> q 2 weeks x 3 followed by CMF q 2 weeks x 3 followed by weekly paclitaxel 80 mg/m<sup>2</sup> x 9. GCSF support in all cycles in E-T-CMF and during the intensified phase of epirubicin and CMF treatments in E-CMF-wD and E-CMF-wT arms.</p> <p>Premenopausal patients received hormonal therapy as in the HE10/97 trial. Postmenopausal patients received anastrozole 1 mg daily for 5 years followed 2-3 years of daily exemestane 25 mg. Criteria for irradiation were the same as in the HE10/97 trial.</p> <p>Patients with HER2-positive tumors were treated with trastuzumab, initially at a dose of 8 mg/kg as a loading dose, and subsequently 6 mg/kg every three weeks for one year. Initially, HER2-positive tumors were considered those with an immunohistochemistry (IHC) score of 3+ (uniform, intense membrane staining of &gt;10% of invasive tumor cells), a fluorescence in situ hybridization (FISH) result of ≥2 HER2 gene copies, or a FISH ratio (HER2 gene signals to chromosome 17 signals) of &gt;2.0. Following the 2007 publication of the American Society of Clinical Oncology/College of American Pathologists guideline recommendations for HER2 testing in breast cancer, the criteria for characterizing a tumor as HER2-positive</p> |                                                                                                                                                                                                                                                                                                                                                                                                                                                                                                                                                                                                                                                                                                                                                                                                                                                                            |                                                                                                                                                                                                                                                                                                                         |
